# Supplementary material for: Regional CNS responses to IFN-γ determine lesion localization patterns during EAE pathogenesis
Source: PubMed Central journal article supplement — J Exp Med. 2008 Oct 27;205(11):2633–42. doi: 10.1084/jem.20080155 (PMC2571937; doi:10.1084/jem.20080155), 2008-10-27
Supplement: jem.20080155_2.pdf [file jem.20080155_2.pdf]

Table S1. **Both BM-derived and CNS resident cells require IFN- $\gamma$  receptor expression to prevent onset of atypical disease**

| Mouse genotype<br>(percentage of donor<br>cells in blood $\pm$ SD) | Incidence of limb<br>dysfunction | Mean peak limb<br>dysfunction clinical<br>score | Incidence of<br>flaccid<br>paralysis | Incidence of<br>dystonia | Incidence of nonclassical<br>EAE |
|--------------------------------------------------------------------|----------------------------------|-------------------------------------------------|--------------------------------------|--------------------------|----------------------------------|
| WT                                                                 | 5/5                              | 4.1 $\pm$ 1                                     | 5/5                                  | 0/5                      | none                             |
| IFN- $\gamma$ R KO                                                 | 8/8                              | 3.4 $\pm$ 2                                     | 0/8                                  | 8/8                      | 8/8                              |
| IFN- $\gamma$ R KO BM into WT<br>(92.7 $\pm$ 0.6)                  | 6/6                              | 3.6 $\pm$ 0.8                                   | 6/6                                  | 0/6                      | 6/6                              |
| WT BM into IFN- $\gamma$ R KO<br>(85.7 $\pm$ 3.1)                  | 6/6                              | 4.7 $\pm$ 0.7                                   | 6/6                                  | 0/6                      | 4/6                              |

Chimeric mice were generated by injection of BM into lethally irradiated C57BL6/J (WT) or congenic IFN- $\gamma$ R-deficient (IFN- $\gamma$ R KO) mice. Chimerism was determined by examination of CD45 allelic markers. MOG-specific Th1 cells generated from C57BL6/J mice were injected into chimeras and nonirradiated WT or IFN- $\gamma$ R KO. Mice were examined over time for clinical signs of movement dysfunction, vertigo/disequilibrium, and ataxia. Results are shown  $\pm$  SD. Results are representative of three separate experiments.
